# Supplementary material for: Differentiation patterns of emperor moths (Lepidoptera: Saturniidae: Saturniinae) of a continental island: divergent evolutionary history driven by Pleistocene glaciations
Source: PeerJ journal article supplement (doi:10.7717/peerj.13240), 2022-04-18

# Rhodinia verecunda

(A)

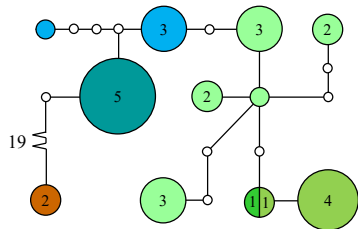

(B)

|       | Rho_v | Rho_f | Rho_n |
|-------|-------|-------|-------|
| Rho_v | 0.3   | 0.7   | 3.7   |

(C)

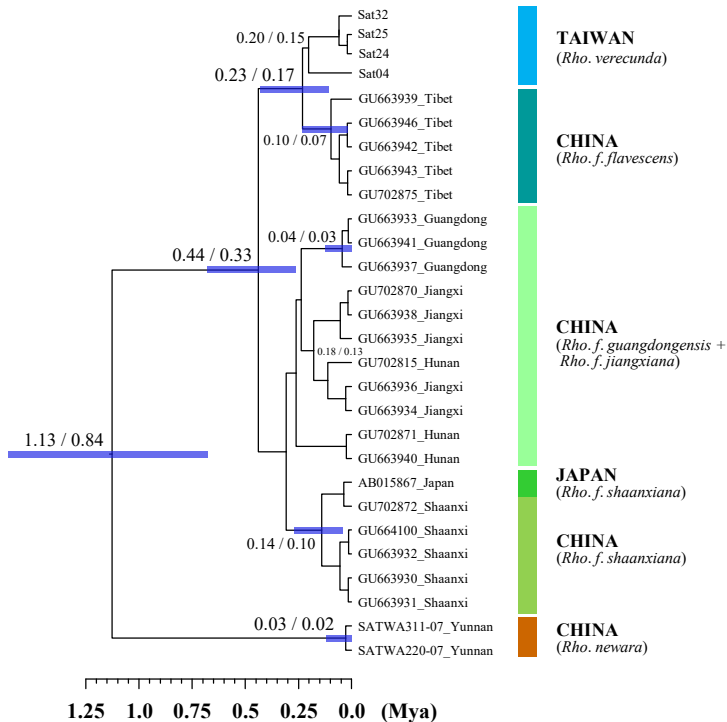

Supplement: Figure_S3_Rhodinia_verecunda.pdf [file Figure_S3_Rhodinia_verecunda.pdf]
