# Supplementary material for: Differentiation patterns of emperor moths (Lepidoptera: Saturniidae: Saturniinae) of a continental island: divergent evolutionary history driven by Pleistocene glaciations
Source: PeerJ journal article supplement (doi:10.7717/peerj.13240), 2022-04-18

# *Loepa formosensis*

(A)

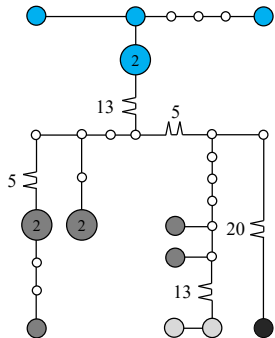

(B)

|       | Loe_f | Loe_d_V | Loe_d_B | Loe_n |
|-------|-------|---------|---------|-------|
| Loe_f | 0.4   | 3.5     | 4.7     | 5.3   |

(C)

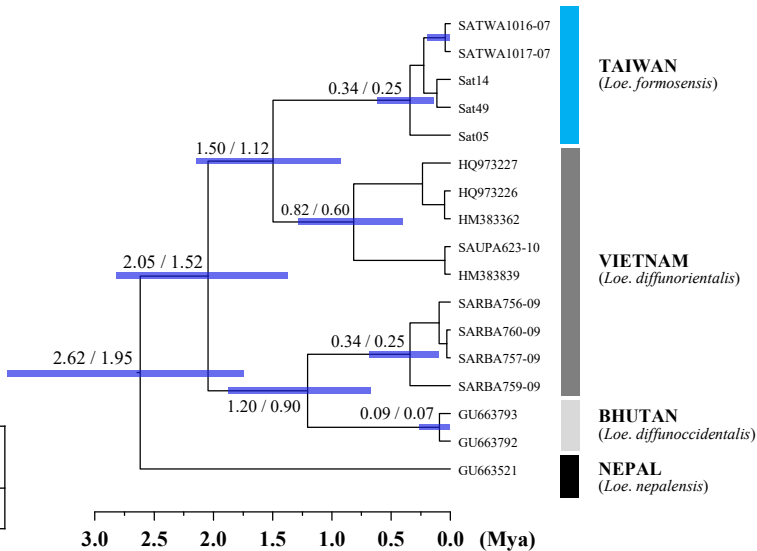

Supplement: Figure_S4_Loepa_formosensis.pdf [file Figure_S4_Loepa_formosensis.pdf]
