# Supplementary material for: Differentiation patterns of emperor moths (Lepidoptera: Saturniidae: Saturniinae) of a continental island: divergent evolutionary history driven by Pleistocene glaciations
Source: PeerJ journal article supplement (doi:10.7717/peerj.13240), 2022-04-18

# *Antheraea superba*

(A)

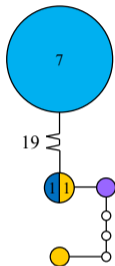

(B)

|       | Ant_s | Ant_y |
|-------|-------|-------|
| Ant_s | 0     | 3.8   |

(C)

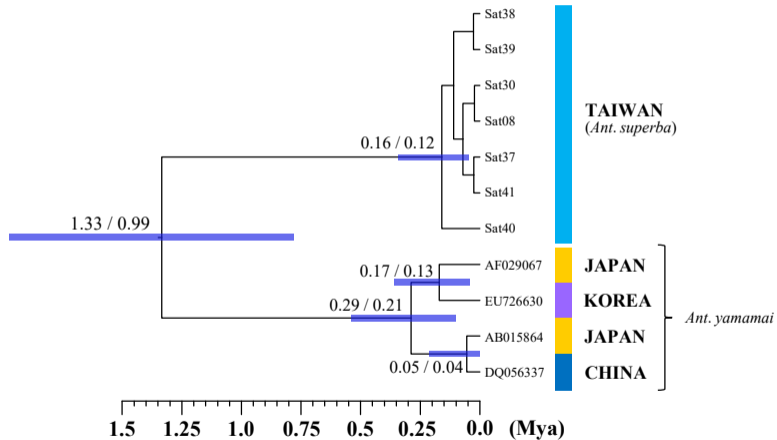

Supplement: Figure_S5_Antheraea_superba.pdf [file Figure_S5_Antheraea_superba.pdf]
