# Supplementary material for: Differentiation patterns of emperor moths (Lepidoptera: Saturniidae: Saturniinae) of a continental island: divergent evolutionary history driven by Pleistocene glaciations
Source: PeerJ journal article supplement (doi:10.7717/peerj.13240), 2022-04-18

# *Antheraea formosana*

(A)

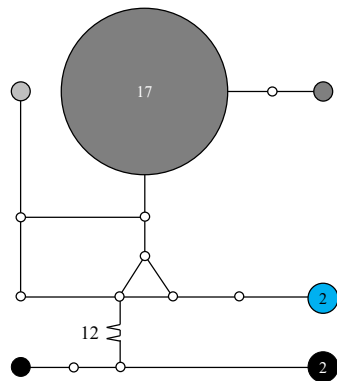

(B)

|       | Ant_f | Ant_a | Ant_p |
|-------|-------|-------|-------|
| Ant_f | 0.4   | 1.1   | 3.4   |

(C)

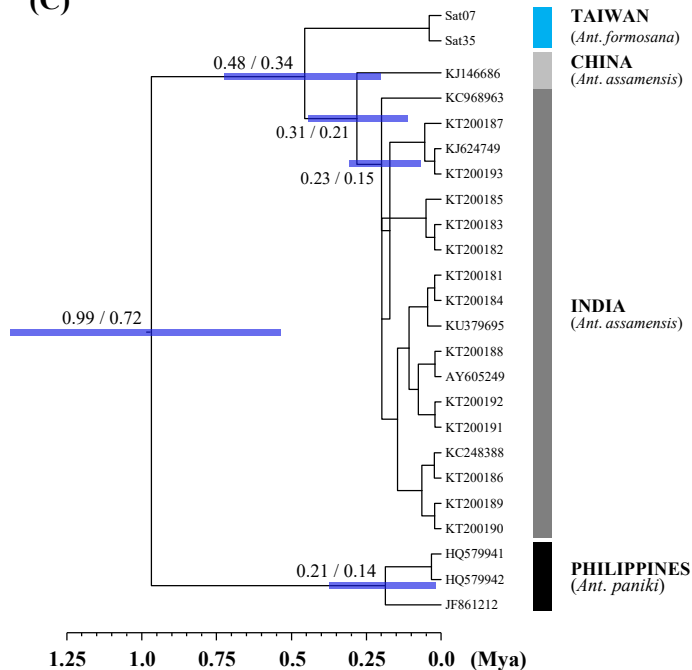

Supplement: Figure_S6_Antheraea_formosana.pdf [file Figure_S6_Antheraea_formosana.pdf]
