# Supplementary material for: Differentiation patterns of emperor moths (Lepidoptera: Saturniidae: Saturniinae) of a continental island: divergent evolutionary history driven by Pleistocene glaciations
Source: PeerJ journal article supplement (doi:10.7717/peerj.13240), 2022-04-18

# *Saturnia fukudai*

(A)

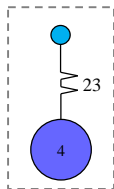

(B)

|       | Sat_f | Sat_b | Sat_j |
|-------|-------|-------|-------|
| Sat_f | -     | 3.6   | 4.3   |

(C)

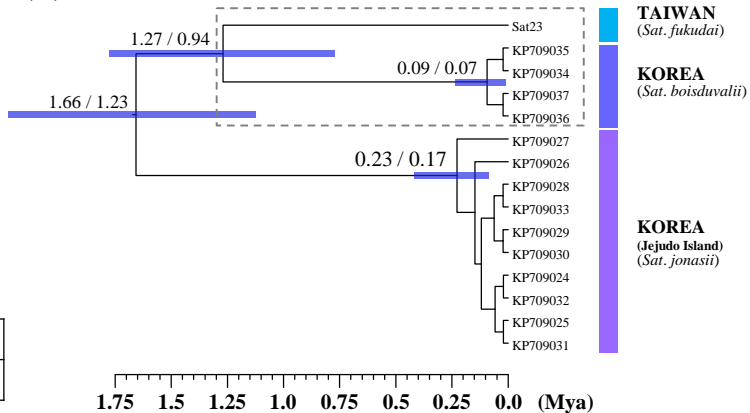

Supplement: Figure_S7_Saturnia_fukudai.pdf [file Figure_S7_Saturnia_fukudai.pdf]
