# Supplementary material for: Differentiation patterns of emperor moths (Lepidoptera: Saturniidae: Saturniinae) of a continental island: divergent evolutionary history driven by Pleistocene glaciations
Source: PeerJ journal article supplement (doi:10.7717/peerj.13240), 2022-04-18

# *Saturnia thibeta okurai*

(A)

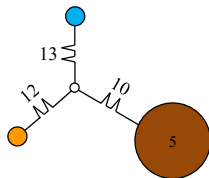

(B)

|           | Sat_thi_o | Sat_thi_p | Sat_thi_e |
|-----------|-----------|-----------|-----------|
| Sat_thi_o | -         | 3.9       | 4.2       |

(C)

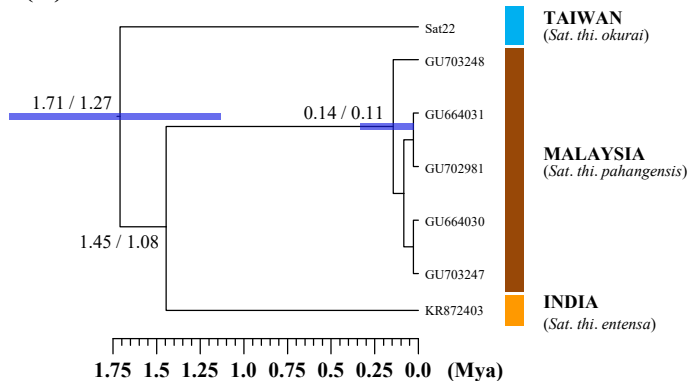

Supplement: Figure_S8_Saturnia_thibeta_okurai.pdf [file Figure_S8_Saturnia_thibeta_okurai.pdf]
