# Supplementary material for: Differentiation patterns of emperor moths (Lepidoptera: Saturniidae: Saturniinae) of a continental island: divergent evolutionary history driven by Pleistocene glaciations
Source: PeerJ journal article supplement (doi:10.7717/peerj.13240), 2022-04-18

# *Saturnia japonica arisana*

(A)

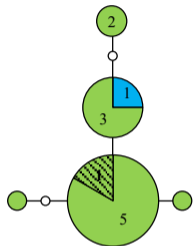

(B)

|           | Sat_jap_a | Sat_jap_j |
|-----------|-----------|-----------|
| Sat_jap_a | -         | 0.2       |

(C)

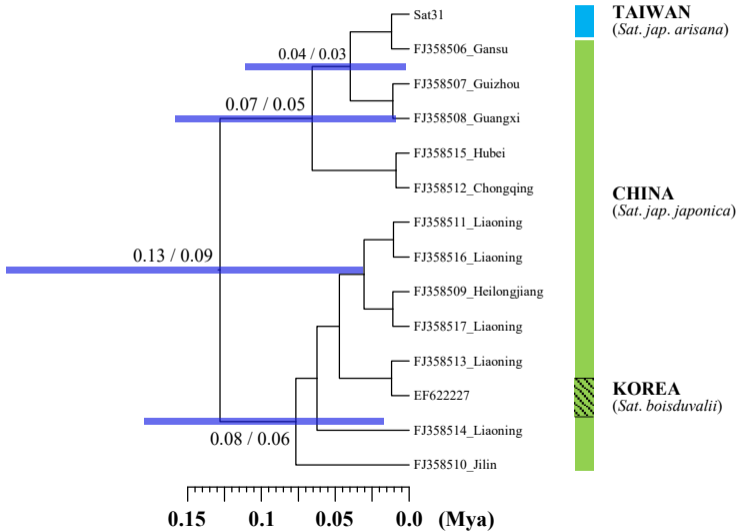

Supplement: Figure_S9_Saturnia_japonica_arisana.pdf [file Figure_S9_Saturnia_japonica_arisana.pdf]
