# Supplementary material for: Differentiation patterns of emperor moths (Lepidoptera: Saturniidae: Saturniinae) of a continental island: divergent evolutionary history driven by Pleistocene glaciations
Source: PeerJ journal article supplement (doi:10.7717/peerj.13240), 2022-04-18

# *Actias sinensis subaurea*

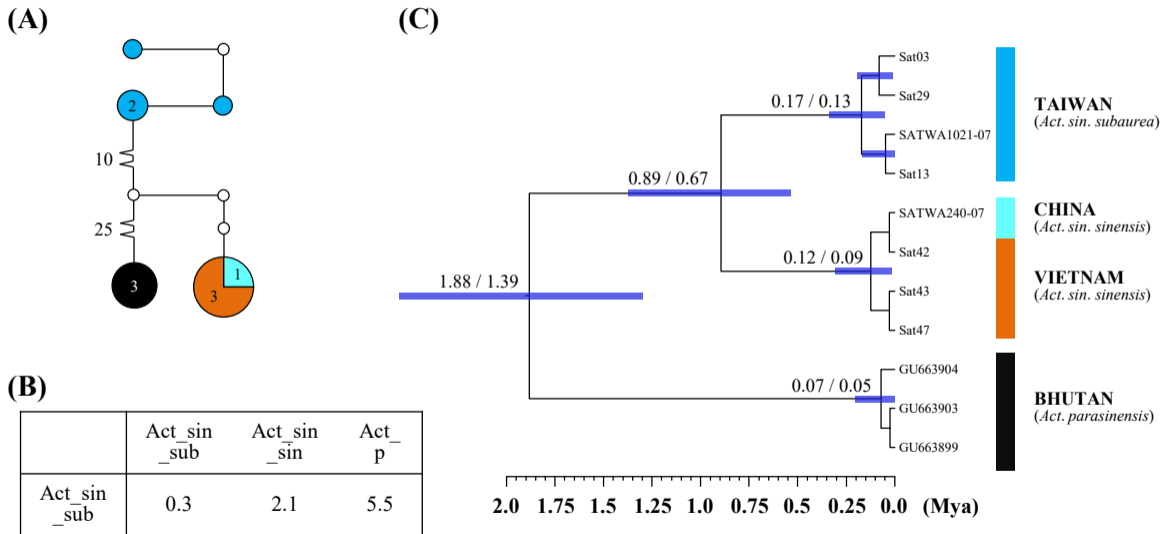

Supplement: Figure_S10_Actia_sinensis_subaurea.pdf [file Figure_S10_Actia_sinensis_subaurea.pdf]
