# Supplementary material for: Differentiation patterns of emperor moths (Lepidoptera: Saturniidae: Saturniinae) of a continental island: divergent evolutionary history driven by Pleistocene glaciations
Source: PeerJ journal article supplement (doi:10.7717/peerj.13240), 2022-04-18

# *Saturnia pyretorum*

(A)

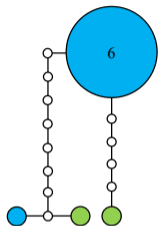

(B)

|      | T_I | T_II | C_I |
|------|-----|------|-----|
| T_II | 1.4 |      |     |
| C_I  | 0.8 | 2.2  |     |
| C_II | 1.4 | 0.3  | 2.2 |

(C)

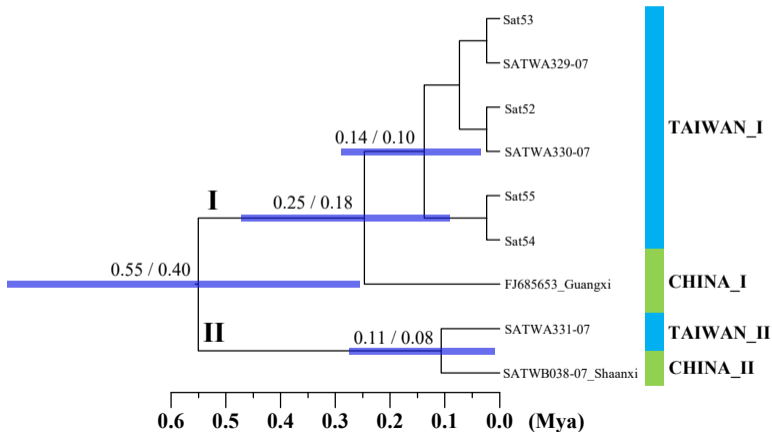

Supplement: Figure_S12_Saturnia_pyretorum.pdf [file Figure_S12_Saturnia_pyretorum.pdf]
