# Supplementary material for: Differentiation patterns of emperor moths (Lepidoptera: Saturniidae: Saturniinae) of a continental island: divergent evolutionary history driven by Pleistocene glaciations
Source: PeerJ journal article supplement (doi:10.7717/peerj.13240), 2022-04-18

# *Samia wangi*

(A)

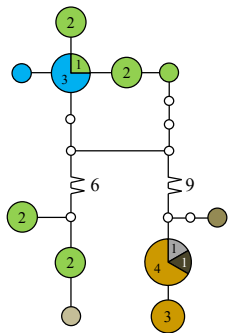

(B)

|         | Sam_w_T | Sam_w_C | Sam_cyn | Sam_r | Sam_can |
|---------|---------|---------|---------|-------|---------|
| Sam_w_T |         |         |         |       |         |
| Sam_w_C | 1.1     |         |         |       |         |
| Sam_cyn | 2.6     | 1.9     |         |       |         |
| Sam_r   | 3.4     | 3.8     | 4.6     |       |         |
| Sam_can | 3.3     | 3.7     | 4.5     | 0.2   |         |

(C)

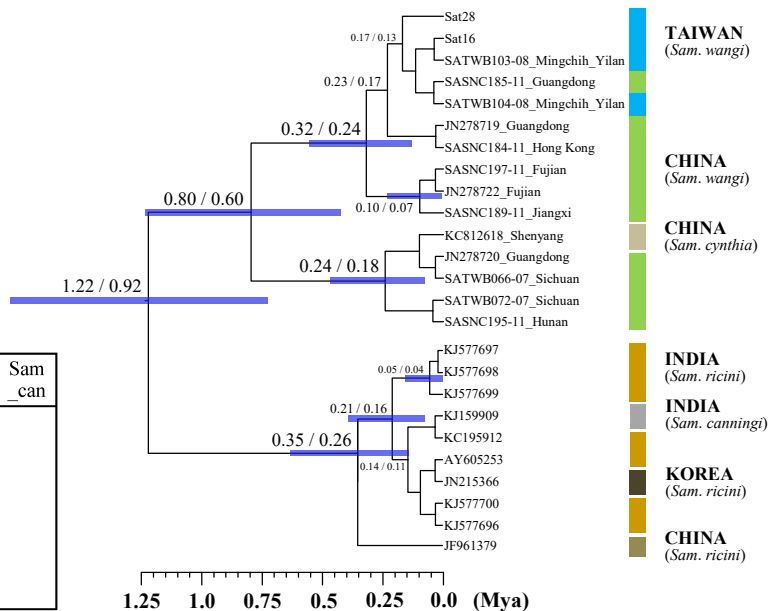

Supplement: Figure_S13_Samia_wangi.pdf [file Figure_S13_Samia_wangi.pdf]
